# Supplementary material for: Self-brushing for nanopatterning: achieving perpendicular domain orientation in block copolymer thin films
Source: Royal Society of Chemistry journal article supplement (doi:10.1039/d4nr00223g), 2024-01-01
Supplement: d4nr00223g1.pdf [file d4nr00223g1.pdf]

## Supporting Information

# Self-Brushing for Nanopatterning: Achieving Perpendicular Domain Orientation in Block Copolymer Thin Films

*Hongbo Feng<sup>1\*</sup>, Wen Chen<sup>1</sup>, Gordon S. W. Craig<sup>1</sup>, Stuart J. Rowan<sup>1,2,3</sup>, Paul F. Nealey<sup>1,4</sup>*

<sup>1</sup> Pritzker School of Molecular Engineering, University of Chicago, 5640 S. Ellis Avenue, Chicago, Illinois 60637, United States

<sup>2</sup> Department of Chemistry, University of Chicago, 5735 S. Ellis Avenue, Chicago, Illinois 60637, United States

<sup>3</sup> Chemical Sciences and Engineering Division, Argonne National Laboratory, 9700 S. Cass Avenue, Lemont, Illinois 60439, United States

<sup>4</sup> Center for Molecular Engineering, Materials Science Division, Argonne National Laboratory, 9700 S. Cass Avenue, Lemont, Illinois, 60439, United States

\*Email: [hfeng9@alum.utk.edu](mailto:hfeng9@alum.utk.edu).

(a)

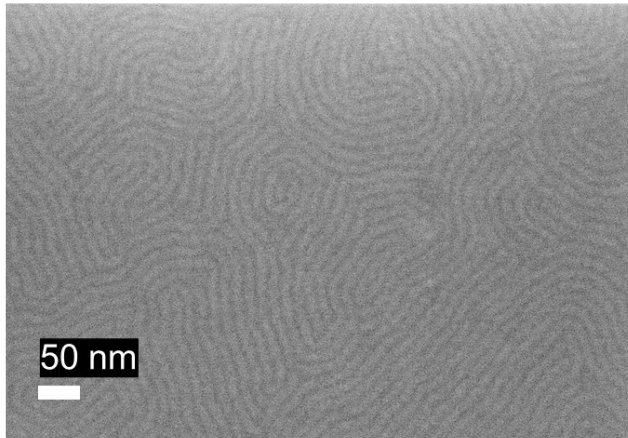

(b)

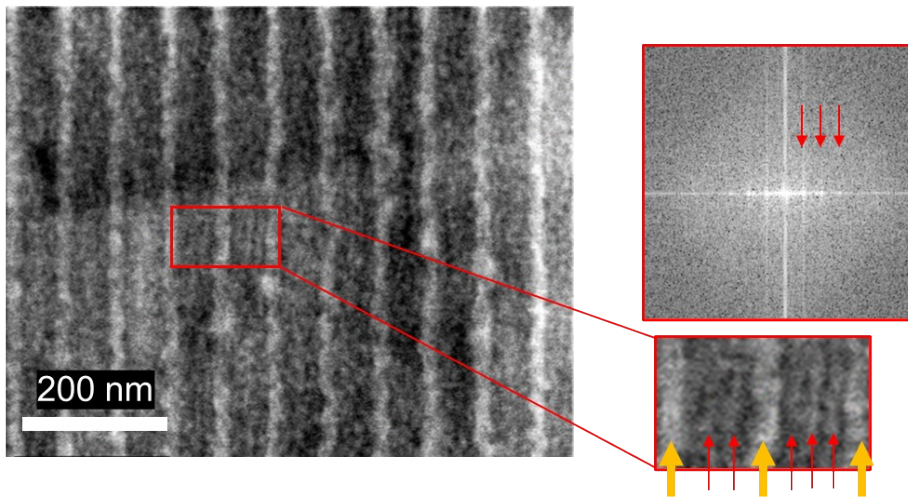

Figure S1. (a) Top-down SEM micrograph of S-*b*-G(TFET-*r*-2MP) with 400,000x magnification. The BCP was annealed on a piranha-treated Si surface. (b) Fourier Transform of post-rinse DSA sample. The red arrows indicate the periodic pitch of x-PS guide stripes. In zoom-in micrograph, red arrows indicate the residue SBL domain with pitch matching to the BCP. The orange arrows indicate the x-PS guide stripes. The relatively low contrast and waviness of the SBL layer is due to current induced film carbonization and defects in DSA.

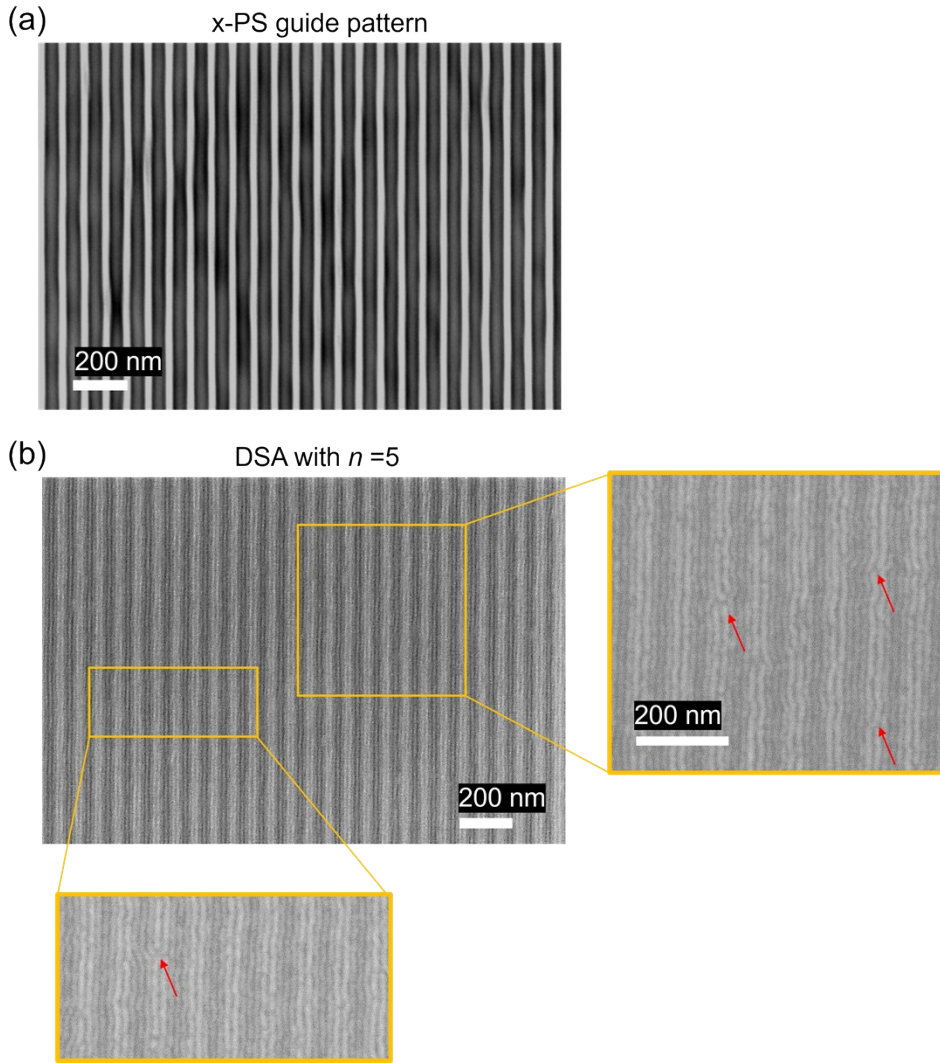

Figure S2. The potential of SBL for DSA. Top-down SEM micrograph of (a) the crosslinked polystyrene (x-PS) guide pattern with pitch  $L_s=76$  nm and width  $L_w=22$  nm; (b) DSA with  $n = 5$  using self-brushing layer as the non-preferential brush. Two Zoom-ins on the selected region are also shown, where the red arrows indicate the presence of defects.

Table S1. Summarized literature values of surface tensions of substrates used in this work.

| Substrate <sup>a</sup> | Surface tension<br>(mJ m <sup>-2</sup> ) | Reference |
|------------------------|------------------------------------------|-----------|
| S                      | 44.2                                     | 1         |
| Si                     | 1140-1900                                | 2         |
| Au                     | 1175                                     | 3         |
| Pt                     | 2600-3500                                | 4, 5      |
| Ti                     | 31-35                                    | 6         |
| SiN <sub>x</sub>       | 74                                       | 7         |
| AlN <sub>x</sub>       | 51                                       | 8, 9      |

<sup>a</sup> S: polystyrene.

Table S2. Comparison of film thickness and grafting densities of SBL in this work and the summarized literature values of film thickness of  $\omega$ -OH terminated polymer brushes.

| Polymer brush <sup>a</sup>        | Reactive moiety to substrate             | MW (kg mol <sup>-1</sup> ) | Thickness (nm) | Grafting density (chain nm <sup>-2</sup> ) <sup>b</sup> | Reference |
|-----------------------------------|------------------------------------------|----------------------------|----------------|---------------------------------------------------------|-----------|
| SBL in this work                  | Side chain<br>secondary-OH<br>(100 mol%) | 19.8                       | 6.5            | 0.2                                                     | N/A       |
| S                                 | $\omega$ -OH                             | 9.8                        | 5              | 0.3                                                     | 10        |
| P(S- <i>r</i> -M) with 45% S      | $\omega$ -OH                             | 3.7                        | 3.9            | 0.6                                                     | 11        |
| P(S- <i>r</i> -M) with 58% S      | $\omega$ -OH                             | 6.2                        | 5-6            | 0.5                                                     | 12        |
| P(S- <i>r</i> -M) with 62.5% S    | $\omega$ -OH                             | 11.2                       | 7.1            | 0.4                                                     | 13        |
| P(S- <i>r</i> -M) with 62.4% S    | $\omega$ -OH                             | 19.5                       | 9.0            | 0.3                                                     | 13        |
| P(S- <i>r</i> -M) with 72% S      | $\omega$ -OH                             | 2.1                        | 2.8            | 0.8                                                     | 11        |
| PMMA                              | $\omega$ -OH                             | 8.0                        | 5              | 0.4                                                     | 10        |
| P(S- <i>r</i> -M- <i>r</i> -HEMA) | Side chain-OH<br>(1-3 mol%)              | 60.0-70.0                  | 8              | 0.07-0.08                                               | 11        |

<sup>a</sup> S: polystyrene; P(S-*r*-M) with #% S: poly(styrene-*random*-methyl methacrylate) with # mol% of S; PMMA: poly(methyl methacrylate); P(S-*r*-M-*r*-HEMA): poly(styrene-*random*-methyl methacrylate-*random*-hydroxyethyl methacrylate) copolymer.

<sup>b</sup>The grafting density is calculated using  $\sigma = \frac{h\rho N_A}{M_n}$ , where  $\rho$  is the density of the polymer (1.0 g cm<sup>-3</sup> is used),  $N_A$  is the Avogadro's constant.

## References

1. Feng, H.; Dolejsi, M.; Zhu, N.; Yim, S.; Loo, W.; Ma, P.; Zhou, C.; Craig, G. S. W.; Chen, W.; Wan, L.; Ruiz, R.; de Pablo, J. J.; Rowan, S. J.; Nealey, P. F., Optimized design of block copolymers with covarying properties for nanolithography. *Nat Mater* **2022**, *21* (12), 1426-1433. 10.1038/s41563-022-01392-1.
2. Messmer, C.; Bilello, J. C., The surface energy of Si, GaAs, and GaP. *Journal of Applied Physics* **1981**, *52* (7), 4623-4629. 10.1063/1.329342.
3. Mays, C.; Vermaak, J.; Kuhlmann-Wilsdorf, D., On surface stress and surface tension: II. Determination of the surface stress of gold. *Surface science* **1968**, *12* (2), 134-140.
4. Tyson, W.; Miller, W., Surface free energies of solid metals: Estimation from liquid surface tension measurements. *Surface Science* **1977**, *62* (1), 267-276.
5. Solliard, C.; Flueli, M., Surface stress and size effect on the lattice parameter in small particles of gold and platinum. *Surface Science* **1985**, *156*, 487-494.
6. Kilpadi, D. V.; Lemons, J. E., Surface energy characterization of unalloyed titanium implants. *Journal of Biomedical Materials Research* **1994**, *28* (12), 1419-1425. <https://doi.org/10.1002/jbm.820281206>.
7. Bauer, J.; Drescher, G.; Illig, M., Surface tension, adhesion and wetting of materials for photolithographic process. *Journal of Vacuum Science & Technology B: Microelectronics and Nanometer Structures Processing, Measurement, and Phenomena* **1996**, *14* (4), 2485-2492. 10.1116/1.588757.
8. Mazur, M. M.; Pianaro, S. A.; Portella, K. F.; Mengarda, P.; Bragança, M. D. O. G. P.; Ribeiro Junior, S.; Santos de Melo, J. S.; Cerqueira, D. P., Deposition and characterization of AlN thin films on ceramic electric insulators using pulsed DC magnetron sputtering. *Surface and Coatings Technology* **2015**, *284*, 247-251. <https://doi.org/10.1016/j.surfcoat.2015.06.082>.
9. Vitalios, N. Surface properties of doped and undoped AlN thin films: Drop measurements and Surface free energy. Aristotle University of Thessaloniki, 2016.
10. Mansky, P.; Liu, Y.; Huang, E.; Russell, T. P.; Hawker, C., Controlling polymer-surface interactions with random copolymer brushes. *Science* **1997**, *275* (5305), 1458-1460.
11. Han, E.; Stuen, K. O.; La, Y.-H.; Nealey, P. F.; Gopalan, P., Effect of Composition of Substrate-Modifying Random Copolymers on the Orientation of Symmetric and Asymmetric Diblock Copolymer Domains. *Macromolecules* **2008**, *41* (23), 9090-9097. 10.1021/ma8018393.
12. Kim, M.; Han, E.; Sweat, D. P.; Gopalan, P., Interplay of surface chemical composition and film thickness on graphoepitaxial assembly of asymmetric block copolymers. *Soft Matter* **2013**, *9* (26), 6135-6141. 10.1039/C3SM50307K.
13. Laus, M.; Chiarcos, R.; Gianotti, V.; Antonioli, D.; Sparnacci, K.; Munaò, G.; Milano, G.; De Nicola, A.; Perego, M., Evidence of Mechanochemical Control in “Grafting to” Reactions of Hydroxy-Terminated Statistical Copolymers. *Macromolecules* **2021**, *54* (1), 499-508. 10.1021/acs.macromol.0c02142.
